# Supplementary material for: Parameter inference for discretely observed stochastic kinetic models using stochastic gradient descent
Source: Springer Nature journal article supplement (doi:10.1186/1752-0509-4-99), 2010-07-21
Supplement: Additional file 1 [file 1752-0509-4-99-s1.docx]

# Supplementary Material

# Parameter inference for discretely observed stochastic kinetic models using stochastic gradient descent

Yuanfeng Wang1,4, Scott Christley2,4, Eric Mjolsness3,4 and Xiaohui Xie3,4†

1Deparment of Physics and Astronomy, 2Department of Mathematics, 3Department of Computer Science, 4Center for Complex Biological Systems, University of California, Irvine, CA 92617, USA

† Corresponding Author

Email addresses:

YW: [yuanfenw@uci.edu](mailto:yuanfenw@uci.edu)

SC: [scott.christley@uci.edu](mailto:scott.christley@uci.edu)

EM: [emj@uci.edu](mailto:emj@uci.edu)

XX: [xhx@uci.edu](mailto:xhx@uci.edu)

**
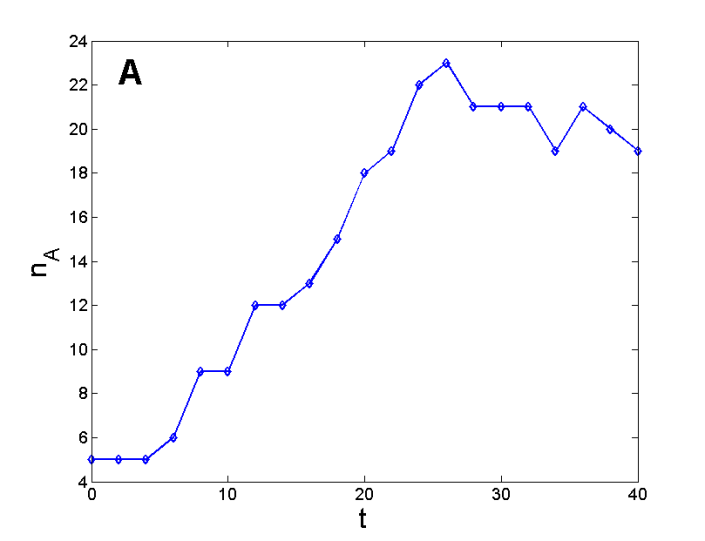

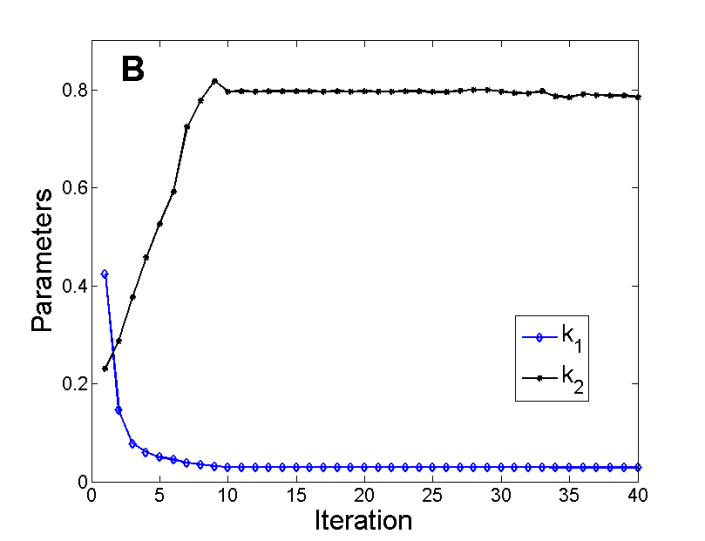

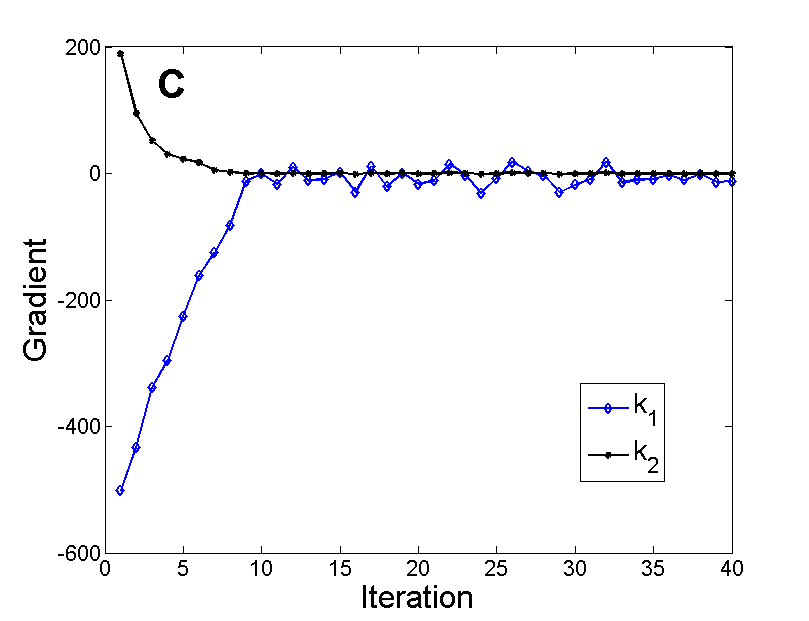
**

**Figure S1 - Gradient descent run for the birth-death process. (a)** shows an observation dataset (the first dataset in Table 2) generated by SSA with initial population = 5 and parameter value (*k*1, *k*2) = (0.03, 0.6). **(b)** The value of parameters (*k*1, *k*2) during one gradient decent run for the data set in (a). **(c)** The value of gradients corresponding to each of the parameters.

**
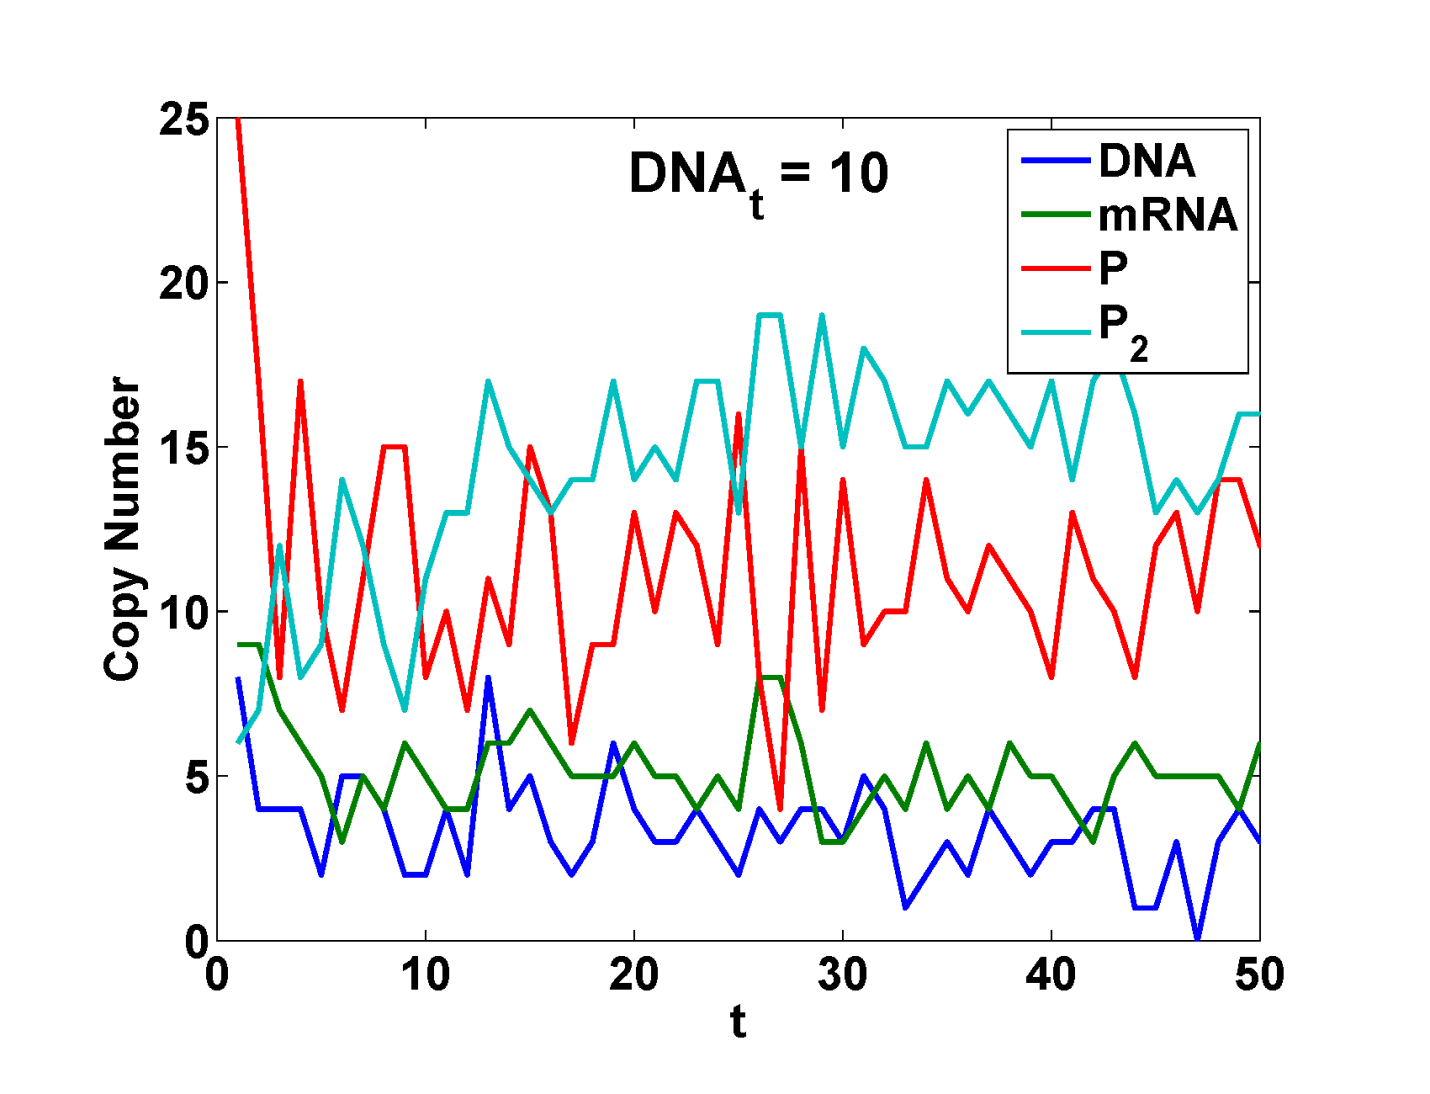
**

**Figure S2 – Plot of the copy number of each species in dataset *D*1 () with species indicated by different colors (in the legend).**

**
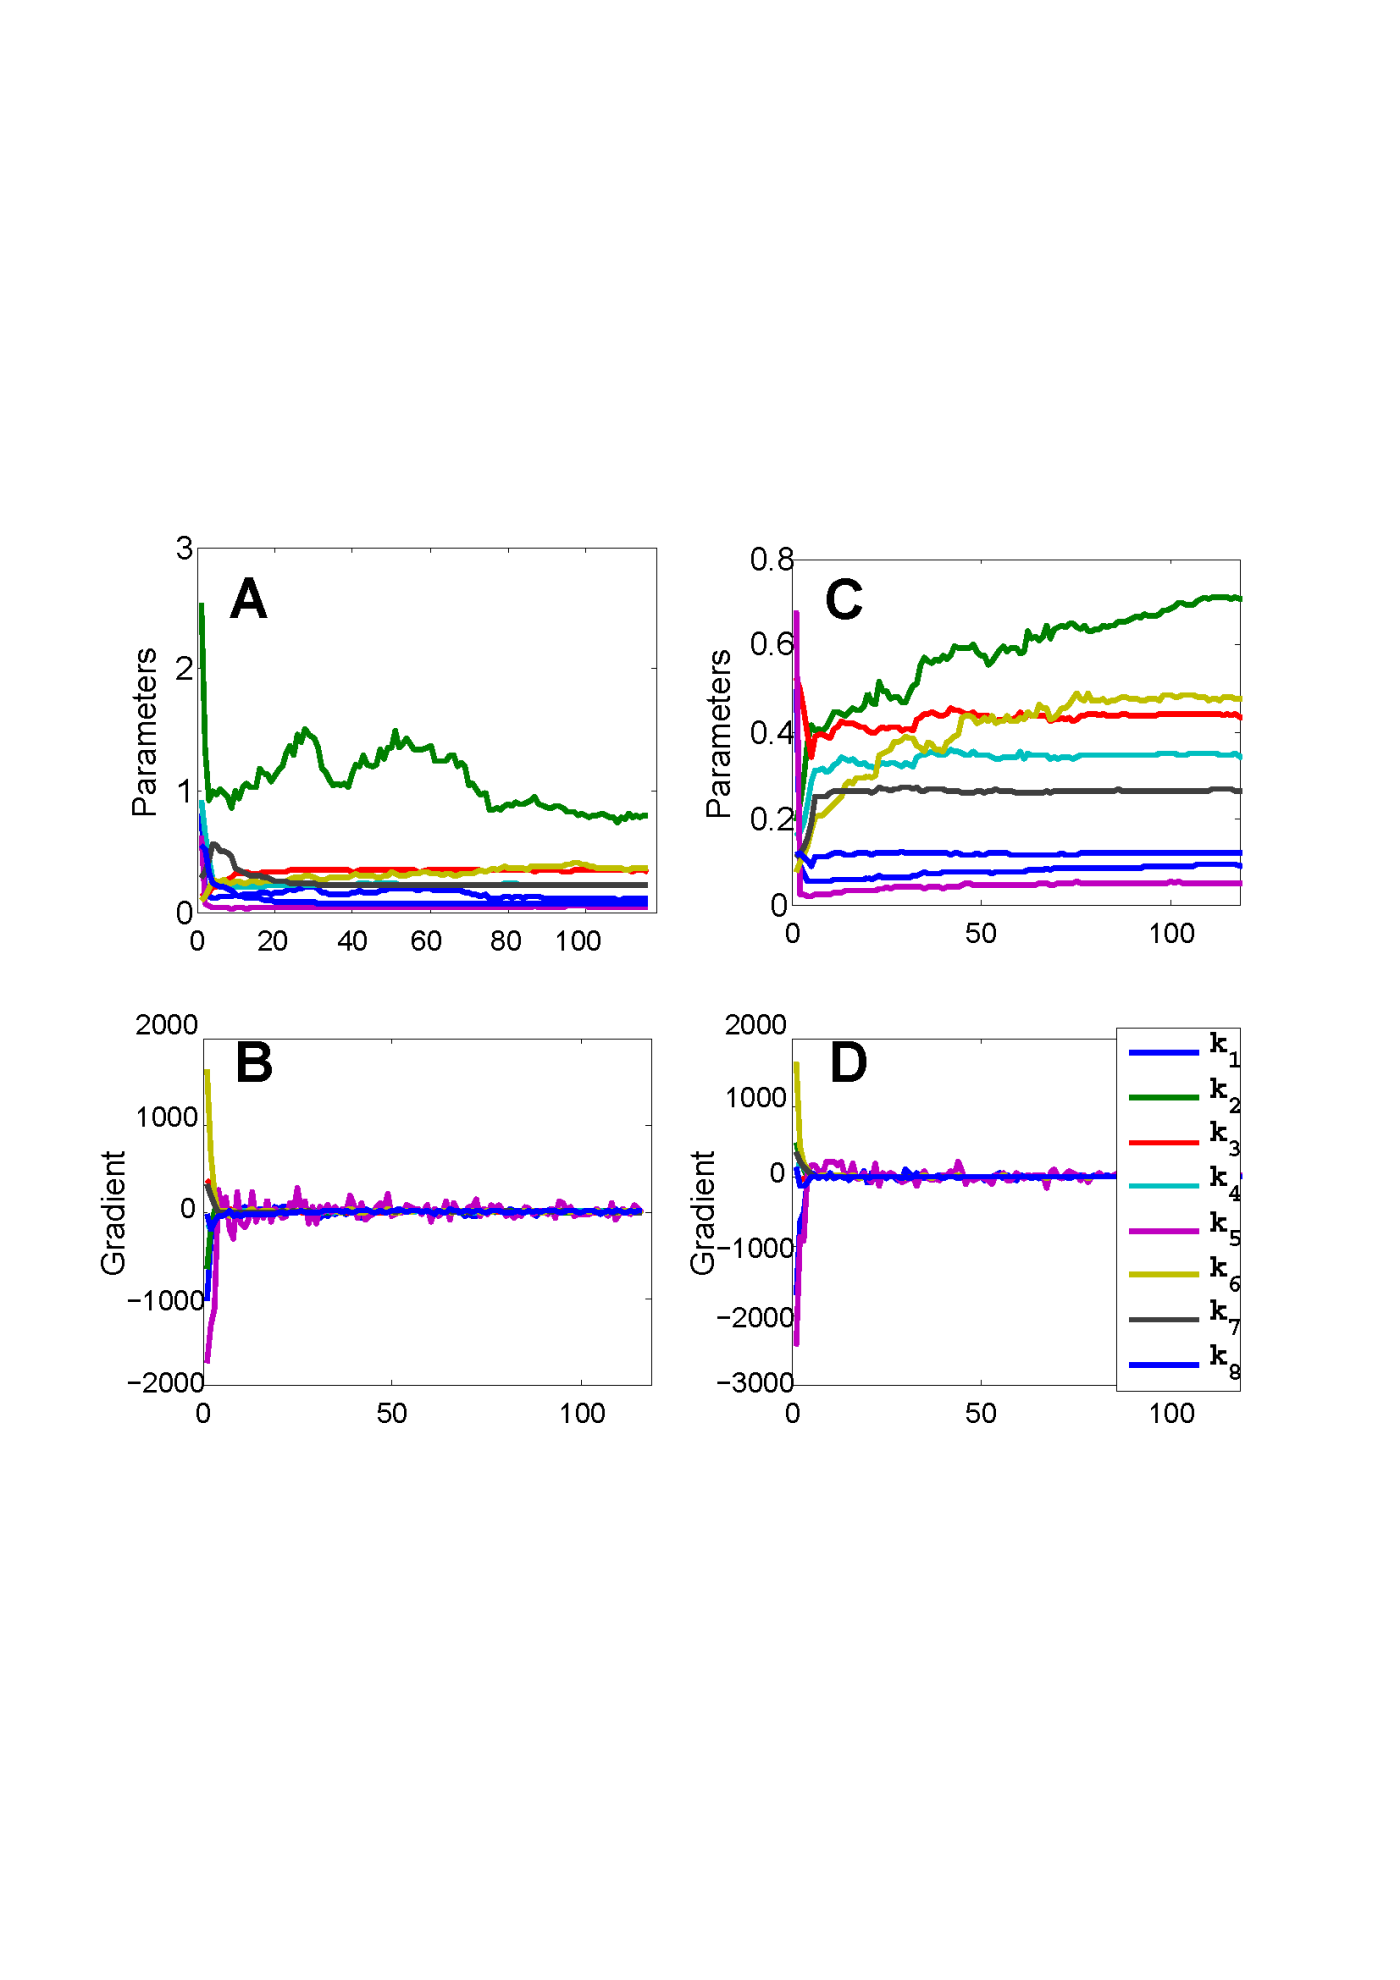
**

**Figure S3 - Gradient descent run for the auto-regulatory gene network model.**Panel **a** and **c** plot the values of eight parameters (*k*1 to *k*8) in one gradient decent run using the dataset *D*1 (the fully observed dataset) and *D*1* (the partially observed dataset) respectively. Panel **b** and **d** show the corresponding gradients of parameters for **a** and **c** respectively. Parameters and corresponding gradients are indicated with different colors.


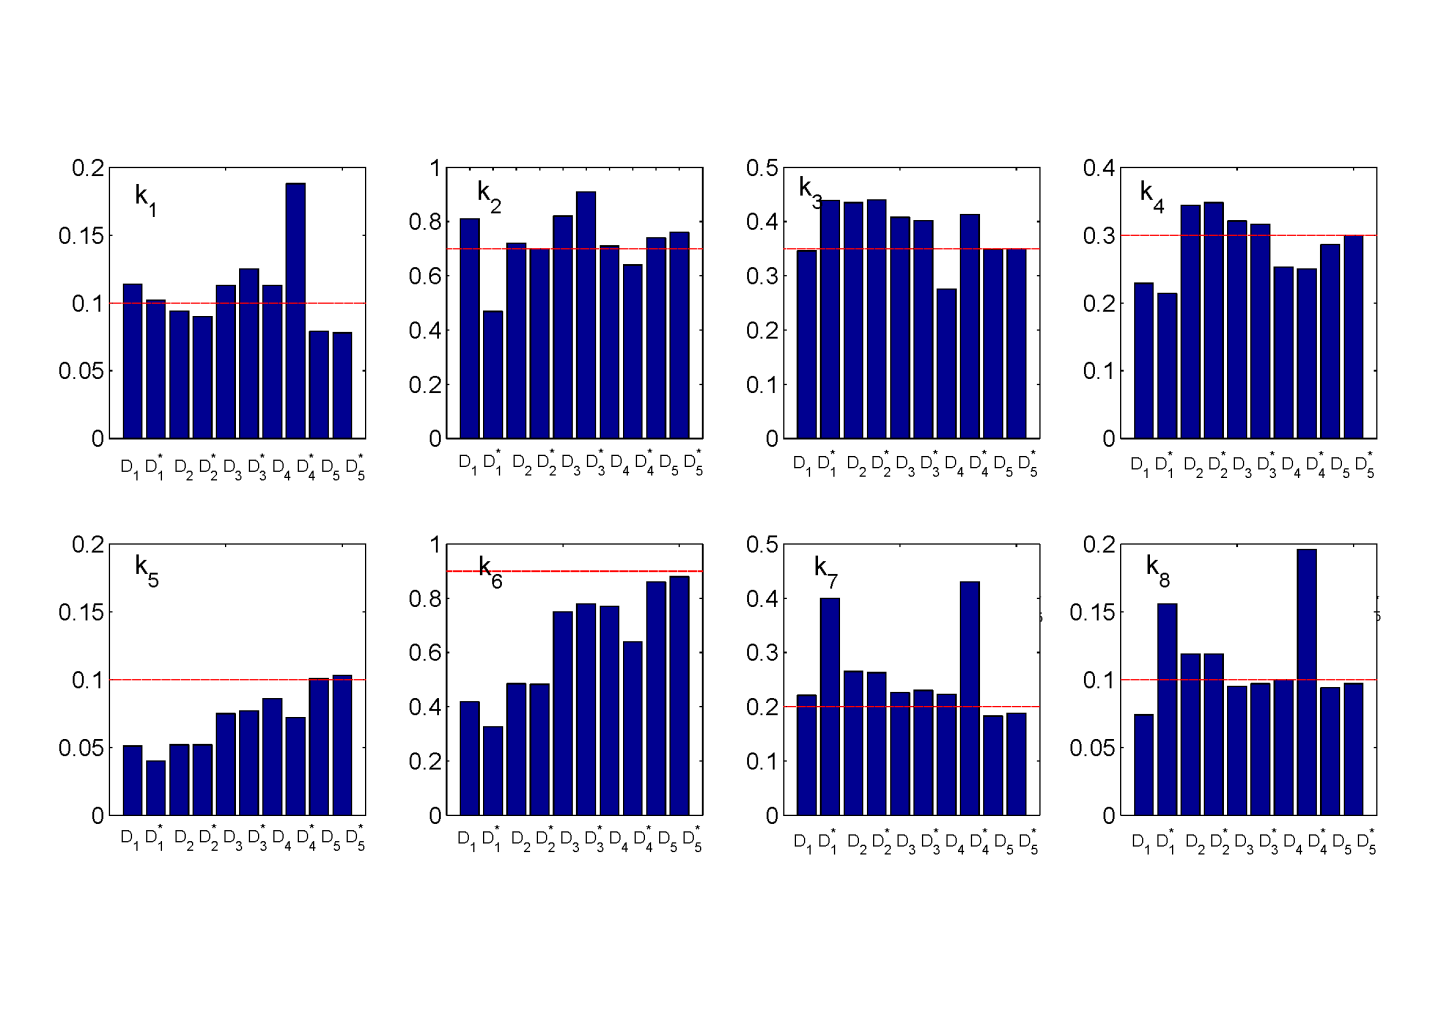


**Figure S4 – Estimated rate parameters in the auto-regulatory gene network.** Bar plots of the estimated values of rate parameters from different observation datasets. Each panel corresponds to parameters *k*1 to *k*8 respectively. Horizontal lines indicate the true values of parameters.

**Table S1.** **Comparison of the inferred parameter values of two methods with the datasets (D1-D3) in Golightly *et al.* 05 [31]**

|  | *k1* | *k2* | *k3* | *k4* | *k5* | *k6* | *k7* | *k8* |
| --- | --- | --- | --- | --- | --- | --- | --- | --- |
| *Dataset1* | 10.086 | 0.673 | 0.35 | 0.287 | 0.061 | 0.59 | 0.242 | 0.14 |
|  | 20.064 | 0.47 | 0.36 | 0.288 | 0.043 | 0.475 | 0.25 | 0.143 |
| *Dataset2* | 10.093 | 0.63 | 0.401 | 0.305 | 0.069 | 0.60 | 0.224 | 0.115 |
|  | 20.058 | 0.36 | 0.285 | 0.24 | 0.048 | 0.477 | 0.285 | 0.121 |
| *Dataset3* | 10.053 | 0.519 | 0.346 | 0.295 | 0.028 | 0.511 | 0.162 | 0.088 |
|  | 20.052 | 0.346 | 0.416 | 0.321 | 0.044 | 0.488 | 0.213 | 0.115 |
| 3Percent error | 22.7 | 13.2 | 5.2 | 2.6 | 47.0 | 37.0 | 17.3 | 22.8 |
| 42.0 | 44.2 | 13.4 | 10.3 | 55.0 | 46.7 | 24.7 | 26.4 |
| 1 Inferred parameter values by our method  2 Mean values of the inferred parameters from Table 1 of [31]  3 percent error is the averaged value over three datasets | | | | | | | | |
